# Supplementary material
Source: Springer Nature journal article supplement (https://www.springermedizin.de/resource/supplementary/12936_2007_450_MOESM3_ESM.pdf/9547474)
Supplement: MOESM3 [file 9547474]

Quote 1 "... it's because all over the place (in the villages) there are worrying rumours causing anxiety, people saying "these people aren't good". You've decided against all odds to go and here someone (fieldworker administering quiz) is asking you, "what has pleased you that you have brought your child?" So then you start asking yourself: Why is s/he asking me that? So you remain with that question in your heart. That's why when others go, they go saying, "I'm just trying my luck with only one child".

Quote 2 "That surprised us [the quiz] and we wondered why they were doing it. They were asking for things that had already been explained to us. Those who visited us [non-participants in homes] warned us that we had enrolled blindly..."

Quote 3: "It was as if they had told us to come and then on the other hand they were blaming us for doing so... It was as if they were saying why are you risking yourselves by involving your children?... why are you bringing problems for your children?"

Quote 4: "[The way the questions were asked] was bad. Eh Heh. He/she did not have good eyes (all laugh)! He/she was talking to you but the eyes were moving from this side to the other (all laugh)... I mean s/he wasn't looking at you and then when h/she finishes reading s/he does not look at you properly..."

Quote 5: "my friend was... asked [by the fieldworker administering the quiz] questions that made her want to pull out.... She was asked 'how many children do you have?' 'Male or female?' 'How could you accept and you've only got one child who you're offering? [all laugh]... after that she was told 'so you are now ready to give your child even it it's a matter of life and death?. My friend said she couldn't answer and didn't come back".

Quote 6: "They were looking at our hearts because a person who is a bit learned will know if a mama is anxious and I ask her this question, she will just panic. Because for instance if you just tremble after being asked a question it means something..."
